# Supplementary material
Source: PubMed Central journal article supplement (PMC9249080)
Supplement: NIHMS1791417-supplement-1791417_Sup_Info.pdf [file NIHMS1791417-supplement-1791417_Sup_Info.pdf]

## Supplementary Abstract (following CONSORT 2010 guidelines for abstracts)

### **Background**

Healthy development of the gut microbiome provides long-term health benefits. Children raised in countries with high infectious disease burdens, like Bangladesh, are frequently exposed to antibiotics and diarrheal pathogens, which perturb gut microbiome assembly. A recent double-blind cluster-randomized controlled in two low-income, densely populated communities in urban Bangladesh found automated water chlorination of shared taps to be an effective strategy for reducing child diarrhea and antibiotic use. Here, we performed exploratory analyses to evaluate the effect of this intervention on children's gut microbiota, including the bacterial pathogens and antibiotic resistance genes (ARGs) they harbored.

### **Methods**

The trial was implemented from July 2015 – December 2016 in two low-income communities in urban Bangladesh: Tongi, a community outside Dhaka city, and Dhaka Uddan, a community within Dhaka city. In brief, 100 shared water taps that served as the primary source of drinking water for children younger than five years old were identified in both communities, then randomly assigned (1:1) to have their drinking water automatically chlorinated at the point of collection by a solid tablet chlorine doser (intervention group) or to be treated by a visually identical doser that supplied vitamin C (active control group). Approximately 500 children were enrolled in each group at baseline. Stool samples were collected one year after the start of the intervention. Following a child's stool production, caretakers were instructed to inoculate a small amount of stool in RNALater (a fecal preservative). Field staff then transported samples to the laboratory, where they were frozen at -80C upon arrival and remained frozen during subsequent shipment to the United States. Study staff stratified available RNALater-preserved stool samples by group, study site, and three pre-specified age strata (6-14 months, 15-30 months, 31 months and older) corresponding to distinct phases of gut microbiome development, then randomly selected samples for short-read, paired-end 150 bp sequencing of total stool DNA. The primary outcome was differentially abundant bacterial genera between treatment and control children across different phases of gut microbiome development. This analysis was not pre-specified in the original trial. Both study participants and researchers selecting samples, processing samples, and performing data analysis were unaware of which households were served by chlorinated taps (double-blinded). This trial is registered with ClinicalTrials.gov, number NCT02606981, and is completed.

### **Findings**

We examined fecal metagenomes from 130 children from the control (n=64) and treatment groups (n=66). Water chlorination was associated with increased abundance of human enterobacteria, but shifts were small in magnitude. We observed no effects on the overall richness or diversity of taxa, and the prevalence of bacterial pathogens was similar across the two groups. However, several clinically relevant ARGs were relatively more abundant in the gut microbiomes of treatment children.

### **Interpretation**

Water chlorination affected the developing gut microbiome of children in urban Bangladesh, including the resistance genes they harbored, though shifts in taxa abundance were generally small in magnitude. While further studies on the long-term health impacts of drinking chlorinated water would be valuable, we conclude that access to chlorinated water did not substantially impact child gut microbiome development in this setting, supporting the use of chlorination to increase global access to safe drinking water.

### **Funding**

The Thrasher Research Fund and The World Bank Strategic Impact Evaluation Fund.

**CONSORT 2010 checklist of information to include when reporting a cluster randomised trial**

| Section/Topic                    | Item No | Standard Checklist item                                                                                                                 | Extension for cluster designs                                                                   | Page No *                                                                                                                     |
|----------------------------------|---------|-----------------------------------------------------------------------------------------------------------------------------------------|-------------------------------------------------------------------------------------------------|-------------------------------------------------------------------------------------------------------------------------------|
| <b>Title and abstract</b>        |         |                                                                                                                                         |                                                                                                 |                                                                                                                               |
|                                  | 1a      | Identification as a randomised trial in the title                                                                                       | Identification as a cluster randomised trial in the title                                       | Title                                                                                                                         |
|                                  | 1b      | Structured summary of trial design, methods, results, and conclusions (for specific guidance see CONSORT for abstracts) <sup>i,ii</sup> | See table 2                                                                                     | Supplementary Material                                                                                                        |
| <b>Introduction</b>              |         |                                                                                                                                         |                                                                                                 |                                                                                                                               |
| <b>Background and objectives</b> | 2a      | Scientific background and explanation of rationale                                                                                      | Rationale for using a cluster design                                                            | Pickering <i>et al.</i> , 2019: Methods, Participants<br>Nadimpalli <i>et al.</i> , 2021: Not updated for this study          |
|                                  | 2b      | Specific objectives or hypotheses                                                                                                       | Whether objectives pertain to the cluster level, the individual participant level or both       | Introduction                                                                                                                  |
| <b>Methods</b>                   |         |                                                                                                                                         |                                                                                                 |                                                                                                                               |
| <b>Trial design</b>              | 3a      | Description of trial design (such as parallel, factorial) including allocation ratio                                                    | Definition of cluster and description of how the design features apply to the clusters          | Pickering <i>et al.</i> , 2019: Methods, Participants<br>Nadimpalli <i>et al.</i> , 2021: Not updated for this study          |
|                                  | 3b      | Important changes to methods after trial commencement (such as eligibility criteria), with reasons                                      |                                                                                                 | Pickering <i>et al.</i> , 2019: N/A<br>Nadimpalli <i>et al.</i> , 2021: Not updated for this study                            |
| <b>Participants</b>              | 4a      | Eligibility criteria for participants                                                                                                   | Eligibility criteria for clusters                                                               | Pickering <i>et al.</i> , 2019: Methods, Participants<br>Nadimpalli <i>et al.</i> , 2021: Methods – Stool collection          |
|                                  | 4b      | Settings and locations where the data were collected                                                                                    |                                                                                                 | Pickering <i>et al.</i> , 2019: Methods, Study design<br>Nadimpalli <i>et al.</i> , 2021: Methods – Stool Collection          |
| <b>Interventions</b>             | 5       | The interventions for each group with sufficient details to allow replication, including how and when they were actually administered   | Whether interventions pertain to the cluster level, the individual participant level or both    | Pickering <i>et al.</i> , 2019: Methods, Intervention delivery<br>Nadimpalli <i>et al.</i> , 2021: Methods – Stool collection |
| <b>Outcomes</b>                  | 6a      | Completely defined pre-specified primary and secondary outcome measures, including how                                                  | Whether outcome measures pertain to the cluster level, the individual participant level or both | Pickering <i>et al.</i> , 2019: Methods – outcomes                                                                            |

|                                         |     |                                                                                                                                                                                             |                                                                                                                                                                                                                         |                                                                                                                                                                                                                                     |
|-----------------------------------------|-----|---------------------------------------------------------------------------------------------------------------------------------------------------------------------------------------------|-------------------------------------------------------------------------------------------------------------------------------------------------------------------------------------------------------------------------|-------------------------------------------------------------------------------------------------------------------------------------------------------------------------------------------------------------------------------------|
|                                         |     | and when they were assessed                                                                                                                                                                 |                                                                                                                                                                                                                         | Nadimpalli <i>et al.</i> , 2021: Methods – Data Analysis                                                                                                                                                                            |
|                                         | 6b  | Any changes to trial outcomes after the trial commenced, with reasons                                                                                                                       |                                                                                                                                                                                                                         | Pickering <i>et al.</i> , 2019: Methods – outcomes<br>Nadimpalli <i>et al.</i> , 2021: N/A for this study                                                                                                                           |
| <b>Sample size</b>                      | 7a  | How sample size was determined                                                                                                                                                              | Method of calculation, number of clusters(s) (and whether equal or unequal cluster sizes are assumed), cluster size, a coefficient of intracluster correlation (ICC or <i>k</i> ), and an indication of its uncertainty | Pickering <i>et al.</i> , 2019: Methods – statistical analysis<br>Nadimpalli <i>et al.</i> , 2021: The original trial was powered to detect reductions in diarrhea. Sample size calculations were not performed for this sub study. |
|                                         | 7b  | When applicable, explanation of any interim analyses and stopping guidelines                                                                                                                |                                                                                                                                                                                                                         | Pickering <i>et al.</i> , 2019: Procedures<br><br>Nadimpalli <i>et al.</i> , 2021: Not updated for this study                                                                                                                       |
| <b>Randomisation:</b>                   |     |                                                                                                                                                                                             |                                                                                                                                                                                                                         |                                                                                                                                                                                                                                     |
| <b>Sequence generation</b>              | 8a  | Method used to generate the random allocation sequence                                                                                                                                      |                                                                                                                                                                                                                         | Pickering <i>et al.</i> , 2019: Methods, Randomisation<br>Nadimpalli <i>et al.</i> , 2021: Not updated for this study                                                                                                               |
|                                         | 8b  | Type of randomisation; details of any restriction (such as blocking and block size)                                                                                                         | Details of stratification or matching if used                                                                                                                                                                           | Pickering <i>et al.</i> , 2019: Methods, Randomisation<br>Nadimpalli <i>et al.</i> , 2021: Methods – Sample Selection for metagenomic sequencing                                                                                    |
| <b>Allocation concealment mechanism</b> | 9   | Mechanism used to implement the random allocation sequence (such as sequentially numbered containers), describing any steps taken to conceal the sequence until interventions were assigned | Specification that allocation was based on clusters rather than individuals and whether allocation concealment (if any) was at the cluster level, the individual participant level or both                              | Pickering <i>et al.</i> , 2019: Methods, Randomisation<br>Nadimpalli <i>et al.</i> , 2021: Not updated for this study                                                                                                               |
| <b>Implementation</b>                   | 10  | Who generated the random allocation sequence, who enrolled participants, and who assigned participants to interventions                                                                     | Replace by 10a, 10b and 10c                                                                                                                                                                                             | Pickering <i>et al.</i> , 2019: Methods, Randomisation<br>Nadimpalli <i>et al.</i> , 2021: Not updated for this study                                                                                                               |
|                                         | 10a |                                                                                                                                                                                             | Who generated the random allocation sequence, who                                                                                                                                                                       | Pickering <i>et al.</i> , 2019: Methods, Randomisation                                                                                                                                                                              |

|                                                             |     |                                                                                                                                                |                                                                                                                                                                     |                                                                                                                                           |
|-------------------------------------------------------------|-----|------------------------------------------------------------------------------------------------------------------------------------------------|---------------------------------------------------------------------------------------------------------------------------------------------------------------------|-------------------------------------------------------------------------------------------------------------------------------------------|
|                                                             |     |                                                                                                                                                | enrolled clusters, and who assigned clusters to interventions                                                                                                       | Nadimpalli <i>et al.</i> , 2021: Not updated for this study                                                                               |
|                                                             | 10b |                                                                                                                                                | Mechanism by which individual participants were included in clusters for the purposes of the trial (such as complete enumeration, random sampling)                  | Pickering <i>et al.</i> , 2019: Methods, Randomisation<br>Nadimpalli <i>et al.</i> , 2021: Not updated for this study                     |
|                                                             | 10c |                                                                                                                                                | From whom consent was sought (representatives of the cluster, or individual cluster members, or both), and whether consent was sought before or after randomisation | Pickering <i>et al.</i> , 2019: Methods, Study design<br>Nadimpalli <i>et al.</i> , 2021: Not updated for this study                      |
| <b>Blinding</b>                                             |     |                                                                                                                                                |                                                                                                                                                                     |                                                                                                                                           |
|                                                             | 11a | If done, who was blinded after assignment to interventions (for example, participants, care providers, those assessing outcomes) and how       |                                                                                                                                                                     | Pickering <i>et al.</i> , 2019: Methods, intervention delivery and masking<br>Nadimpalli <i>et al.</i> , 2021: Methods – Stool collection |
|                                                             | 11b | If relevant, description of the similarity of interventions                                                                                    |                                                                                                                                                                     | Pickering <i>et al.</i> , 2019: Methods, intervention delivery and masking<br>Nadimpalli <i>et al.</i> , 2021: Not updated for this study |
| <b>Statistical methods</b>                                  |     |                                                                                                                                                |                                                                                                                                                                     |                                                                                                                                           |
|                                                             | 12a | Statistical methods used to compare groups for primary and secondary outcomes                                                                  | How clustering was taken into account                                                                                                                               | Pickering <i>et al.</i> , 2019: Methods – statistical analysis<br>Nadimpalli <i>et al.</i> , 2021: Methods – Data analysis                |
|                                                             | 12b | Methods for additional analyses, such as subgroup analyses and adjusted analyses                                                               |                                                                                                                                                                     | Pickering <i>et al.</i> , 2019: Methods – statistical analysis<br>Nadimpalli <i>et al.</i> , 2021: Methods – Data analysis, Results       |
| <b>Results</b>                                              |     |                                                                                                                                                |                                                                                                                                                                     |                                                                                                                                           |
| <b>Participant flow (a diagram is strongly recommended)</b> |     |                                                                                                                                                |                                                                                                                                                                     |                                                                                                                                           |
|                                                             | 13a | For each group, the numbers of participants who were randomly assigned, received intended treatment, and were analysed for the primary outcome | For each group, the numbers of clusters that were randomly assigned, received intended treatment, and were analysed for the primary outcome                         | Pickering <i>et al.</i> , 2019: Figure 1<br>Nadimpalli <i>et al.</i> , 2021: Table 1                                                      |
|                                                             | 13b | For each group, losses and exclusions after randomisation, together with reasons                                                               | For each group, losses and exclusions for both clusters and individual cluster members                                                                              | Pickering <i>et al.</i> , 2019: Figure 1<br>Nadimpalli <i>et al.</i> , 2021: Not updated for this study                                   |

|                                |     |                                                                                                                                                   |                                                                                                                                            |                                                                                                                                                 |
|--------------------------------|-----|---------------------------------------------------------------------------------------------------------------------------------------------------|--------------------------------------------------------------------------------------------------------------------------------------------|-------------------------------------------------------------------------------------------------------------------------------------------------|
| <b>Recruitment</b>             | 14a | Dates defining the periods of recruitment and follow-up                                                                                           |                                                                                                                                            | Pickering <i>et al.</i> , 2019: Results<br>Nadimpalli <i>et al.</i> , 2021: Methods – Stool Collection                                          |
|                                | 14b | Why the trial ended or was stopped                                                                                                                |                                                                                                                                            | Pickering <i>et al.</i> , 2019: Results and Discussion<br>Nadimpalli <i>et al.</i> , 2021: Not updated for this study                           |
| <b>Baseline data</b>           | 15  | A table showing baseline demographic and clinical characteristics for each group                                                                  | Baseline characteristics for the individual and cluster levels as applicable for each group                                                | Pickering <i>et al.</i> , 2019: Table 1<br>Nadimpalli <i>et al.</i> , 2021: Table 1                                                             |
| <b>Numbers analysed</b>        | 16  | For each group, number of participants (denominator) included in each analysis and whether the analysis was by original assigned groups           | For each group, number of clusters included in each analysis                                                                               | Pickering <i>et al.</i> , 2019: Figure 1<br>Nadimpalli <i>et al.</i> , 2021: Table 1                                                            |
| <b>Outcomes and estimation</b> | 17a | For each primary and secondary outcome, results for each group, and the estimated effect size and its precision (such as 95% confidence interval) | Results at the individual or cluster level as applicable and a coefficient of intracluster correlation (ICC or k) for each primary outcome | Pickering <i>et al.</i> , 2019: Figure 1, Table 3<br>Nadimpalli <i>et al.</i> , 2021: Results, Figure 1, Figure 3, Table 2                      |
|                                | 17b | For binary outcomes, presentation of both absolute and relative effect sizes is recommended                                                       |                                                                                                                                            | Pickering <i>et al.</i> , 2019: Table 3<br>Nadimpalli <i>et al.</i> , 2021: Table 2                                                             |
| <b>Ancillary analyses</b>      | 18  | Results of any other analyses performed, including subgroup analyses and adjusted analyses, distinguishing pre-specified from exploratory         |                                                                                                                                            | Pickering <i>et al.</i> , 2019: Results, Table 2, Table 3<br>Nadimpalli <i>et al.</i> , 2021: Results, Figure 2, Supplementary Material         |
| <b>Harms</b>                   | 19  | All important harms or unintended effects in each group (for specific guidance see CONSORT for harms <sup>iii</sup> )                             |                                                                                                                                            | Pickering <i>et al.</i> , 2019: Results<br>Nadimpalli <i>et al.</i> , 2021: Not updated for this study, as focused on secondary sample analysis |
| <b>Discussion</b>              |     |                                                                                                                                                   |                                                                                                                                            |                                                                                                                                                 |
| <b>Limitations</b>             | 20  | Trial limitations, addressing sources of potential bias, imprecision, and, if relevant, multiplicity of analyses                                  |                                                                                                                                            | Pickering <i>et al.</i> , 2019: Discussion<br>Nadimpalli <i>et al.</i> , 2021: Discussion                                                       |
| <b>Generalisability</b>        | 21  | Generalisability (external validity, applicability) of the trial findings                                                                         | Generalisability to clusters and/or individual participants (as relevant)                                                                  | Pickering <i>et al.</i> , 2019: Discussion                                                                                                      |

|                          |    |                                                                                                               |                                                                                                                                                                        |
|--------------------------|----|---------------------------------------------------------------------------------------------------------------|------------------------------------------------------------------------------------------------------------------------------------------------------------------------|
|                          |    |                                                                                                               | Nadimpalli <i>et al.</i> ,<br>2021: Results,<br>Discussion                                                                                                             |
| <b>Interpretation</b>    | 22 | Interpretation consistent with results, balancing benefits and harms, and considering other relevant evidence | Pickering <i>et al.</i> ,<br>2019: Discussion<br>Nadimpalli <i>et al.</i> ,<br>2021: Discussion                                                                        |
| <b>Other information</b> |    |                                                                                                               |                                                                                                                                                                        |
| <b>Registration</b>      | 23 | Registration number and name of trial registry                                                                | Pickering <i>et al.</i> ,<br>2019: Methods<br>Nadimpalli <i>et al.</i> ,<br>2021: Not updated<br>for this study                                                        |
| <b>Protocol</b>          | 24 | Where the full trial protocol can be accessed, if available                                                   | Pickering <i>et al.</i> ,<br>2019: Published on<br>Open Science<br>Framework, link in<br>Methods<br>Nadimpalli <i>et al.</i> ,<br>2021: Not updated<br>for this study  |
| <b>Funding</b>           | 25 | Sources of funding and other support (such as supply of drugs), role of funders                               | Pickering <i>et al.</i> ,<br>2019: Abstract,<br>Role of Funder<br>section<br>Nadimpalli <i>et al.</i> ,<br>2021:<br>Acknowledgements,<br>Role of the Funding<br>Source |

\* Note: page numbers optional depending on journal requirements

## Supplementary Tables

Table 1. Differentially abundant bacterial genera among 130 treatment and control children participating in an automated water chlorination intervention trial in Bangladesh, overall and by three age strata corresponding to distinct phases of gut microbiome development.

| Genera                           | Treatment Coefficient (95% CI) <sup>a</sup> | fdr-corrected <i>p</i> -value <sup>b</sup> |
|----------------------------------|---------------------------------------------|--------------------------------------------|
| <b>Overall</b>                   |                                             |                                            |
| <i>Akkermansia</i>               | 2.42 (1.87, 2.98)                           | 4.55E-14                                   |
| <i>Escherichia</i>               | 1.11 (0.67, 1.55)                           | 2.20E-06                                   |
| <i>Flavonifractor</i>            | 0.89 (0.5, 1.27)                            | 1.83E-05                                   |
| <i>Phascolarctobacterium</i>     | 2.11 (1.54, 2.69)                           | 6.44E-11                                   |
| <b>Age 6-14 months</b>           |                                             |                                            |
| <i>Alysiella</i>                 | 0.99 (0.46, 1.52)                           | 0.00148608                                 |
| <i>Aureimonas</i>                | 0.26 (0.13, 0.4)                            | 0.00097828                                 |
| <i>Bombilactobacillus</i>        | 1.31 (0.74, 1.88)                           | 0.00020148                                 |
| <i>Bremerella</i>                | 1.14 (0.63, 1.65)                           | 0.00025458                                 |
| <i>Candidatus Nitrotoga</i>      | 1.22 (0.84, 1.6)                            | 2.8404E-06                                 |
| <i>Candidatus Reidiella</i>      | -1.24 (-1.79, -0.68)                        | 0.00025753                                 |
| <i>Candidatus Vampirococcus</i>  | -1.15 (-1.66, -0.63)                        | 0.00025989                                 |
| <i>Chromohalobacter</i>          | -0.82 (-1.14, -0.51)                        | 4.3267E-05                                 |
| <i>Ferriphaselus</i>             | 1.41 (0.73, 2.09)                           | 0.00055415                                 |
| <i>Furfurilactobacillus</i>      | -1.87 (-2.4, -1.33)                         | 8.967E-07                                  |
| <i>Fusobacterium</i>             | 2.55 (1.37, 3.74)                           | 0.00037227                                 |
| <i>Inhella</i>                   | 0.67 (0.42, 0.93)                           | 4.1354E-05                                 |
| <i>Jinshanibacter</i>            | 1.11 (0.65, 1.58)                           | 0.00013004                                 |
| <i>Lactobacillus</i>             | -4.59 (-5.8, -3.39)                         | 2.3712E-07                                 |
| <i>Laribacter</i>                | 1.23 (0.74, 1.73)                           | 7.5377E-05                                 |
| <i>Latilactobacillus</i>         | -0.78 (-1.03, -0.53)                        | 4.8752E-06                                 |
| <i>Leuconostoc</i>               | -3.22 (-4.52, -1.92)                        | 8.3036E-05                                 |
| <i>Mariprofundus</i>             | 0.48 (0.24, 0.71)                           | 0.00064749                                 |
| <i>Mycetohabitans</i>            | 2.12 (1.73, 2.51)                           | 6.8067E-10                                 |
| <i>Natronoglycomyces</i>         | -2.06 (-3.13, -1)                           | 0.00107337                                 |
| <i>Nitrospira</i>                | -1.14 (-1.73, -0.55)                        | 0.00104238                                 |
| <i>Paenarthrobacter</i>          | -1.16 (-1.77, -0.56)                        | 0.00109374                                 |
| <i>Paraphotobacterium</i>        | 1.79 (0.91, 2.67)                           | 0.00068419                                 |
| <i>Phascolarctobacterium</i>     | 2.68 (1.45, 3.92)                           | 0.00036026                                 |
| <i>Plesiomonas</i>               | 5.04 (3.31, 6.77)                           | 1.1257E-05                                 |
| <i>Propionimicrobium</i>         | 1.15 (0.76, 1.53)                           | 8.2463E-06                                 |
| <i>Rothia</i>                    | -1.06 (-1.7, -0.43)                         | 0.00358964                                 |
| <i>Sphingosinithalassobacter</i> | -0.97 (-1.29, -0.65)                        | 6.1356E-06                                 |

|                               |                      |            |
|-------------------------------|----------------------|------------|
| <i>Streptococcus</i>          | -1.66 (-2.55, -0.77) | 0.00144412 |
| <i>Telmatocola</i>            | 1.68 (1.11, 2.24)    | 9.4924E-06 |
| <i>Terricaulis</i>            | -2.13 (-3.06, -1.21) | 0.00019193 |
| <i>Thermanaerovibrio</i>      | 2.46 (1.3, 3.63)     | 0.0004472  |
| <i>Thermodesulfatator</i>     | -2.02 (-2.95, -1.09) | 0.00035531 |
| <i>Usitatibacter</i>          | 0.39 (0.21, 0.58)    | 0.0004252  |
| <b>Age 15-30 months</b>       |                      |            |
| <i>Bergeyella</i>             | -1.11 (-1.62, -0.59) | 1.22E-04   |
| <i>Casimicrobium</i>          | -0.95 (-1.5, -0.4)   | 1.40E-03   |
| <i>Ciceribacter</i>           | -1.46 (-2.29, -0.63) | 1.26E-03   |
| <i>Comamonas</i>              | -1.49 (-2.2, -0.78)  | 1.54E-04   |
| <i>Erysipelatoclostridium</i> | 0.95 (0.49, 1.41)    | 2.19E-04   |
| <i>Flavonifractor</i>         | 1.76 (1.27, 2.25)    | 9.23E-09   |
| <i>Fusobacterium</i>          | 1.07 (0.46, 1.69)    | 1.36E-03   |
| <i>Lancefieldella</i>         | 1.15 (0.61, 1.7)     | 1.46E-04   |
| <i>Leuconostoc</i>            | -2.95 (-4.02, -1.89) | 2.24E-06   |
| <i>Methylacidimicrobium</i>   | -0.84 (-1.28, -0.39) | 6.42E-04   |
| <i>Microcystis</i>            | -0.85 (-1.33, -0.37) | 1.24E-03   |
| <i>Parabacteroides</i>        | 1.19 (0.52, 1.85)    | 1.05E-03   |
| <i>Pasteurella</i>            | -0.65 (-0.96, -0.34) | 1.55E-04   |
| <i>Phascolarctobacterium</i>  | 2.3 (1.44, 3.16)     | 4.12E-06   |
| <i>Piscirickettsia</i>        | -0.95 (-1.45, -0.44) | 6.16E-04   |
| <i>Psychrobacter</i>          | -0.61 (-0.94, -0.28) | 7.69E-04   |
| <i>Tuwongella</i>             | -0.9 (-1.4, -0.4)    | 1.06E-03   |
| <i>Verrucomicrobium</i>       | -0.75 (-1.18, -0.32) | 1.24E-03   |
| <i>Weissella</i>              | -1.76 (-2.77, -0.76) | 1.28E-03   |
| <b>Age 31-61 months</b>       |                      |            |
| <i>Akkermansia</i>            | 3.03 (2.09, 3.98)    | 1.01E-07   |

<sup>a</sup>Treatment coefficients generated by the R package *corncob*, representing the additive change in the logit-transformed relative abundance of bacterial genera between treatment and control children.

<sup>b</sup> *p*-value generated by *corncob*. The Benjamini-Hochberg method was used to correct for multiple comparisons.



Table 2. Effect of extended exposure to a water chlorination intervention (greater than or equal to 6 months) on differentially abundant genera among treatment and control children aged 15 months and older.

| Genera                       | 15-61 months<br>(n=103)               |                                               | 15-61 months and exposed to the<br>intervention for at least 6 months<br>(n=91) |                                               |
|------------------------------|---------------------------------------|-----------------------------------------------|---------------------------------------------------------------------------------|-----------------------------------------------|
|                              | Treat. Coef.<br>(95% CI) <sup>a</sup> | fdr-corrected<br><i>p</i> -value <sup>b</sup> | Treat. Coef.<br>(95% CI) <sup>a</sup>                                           | fdr-corrected<br><i>p</i> -value <sup>b</sup> |
| <i>Akkermansia</i>           | 2.44 (1.84, 3.03)                     | 1.90E-12                                      | 0.64 (0.22, 1.07)                                                               | 0.179423723                                   |
| <i>Flavonifractor</i>        | 0.92 (0.5, 1.33)                      | 0.00777148                                    | 0.83 (0.38, 1.28)                                                               | 0.097962071                                   |
| <i>Phascolarctobacterium</i> | 1.97 (1.34, 2.59)                     | 5.79E-07                                      | 1.95 (1.25, 2.64)                                                               | 5.60E-05                                      |

<sup>a</sup>Treatment coefficients generated by the R package *corncob*, representing the additive change in the logit-transformed relative abundance of bacterial genera between treatment and control children.

<sup>b</sup>*p*-value generated by *corncob*. The Benjamini-Hochberg method was used to correct for multiple comparisons.

Table 3. Detection of 14 gastrointestinal pathogens in the stool of 527 children participating in a cluster-randomized automated water chlorination trial.

|                                                            | Control<br>n=278 (%) | Treatment<br>n=249 (%) | RR (95% CI)       | Adjusted <i>p</i> -value |
|------------------------------------------------------------|----------------------|------------------------|-------------------|--------------------------|
| Norovirus GI/GII                                           | 51 (18)              | 31 (12)                | 0.65 (0.41, 1.02) | 0.56                     |
| <i>Campylobacter</i>                                       | 55 (20)              | 49 (20)                | 0.93 (0.63, 1.37) | 0.78                     |
| <i>Salmonella</i>                                          | 94 (34)              | 79 (32)                | 0.93 (0.69, 1.26) | 0.78                     |
| Enterotoxigenic <i>E. coli</i> (ETEC) LT/ST                | 77 (28)              | 66 (27)                | 0.93 (0.67, 1.30) | 0.78                     |
| <i>Shigella</i>                                            | 71 (26)              | 73 (29)                | 1.15 (0.83, 1.60) | 0.78                     |
| <i>Giardia</i>                                             | 105 (38)             | 102 (41)               | 1.05 (0.80, 1.39) | 0.78                     |
| Pathogenic <i>E. coli</i> <sup>a</sup>                     | 132 (48)             | 123 (49)               | 1.05 (0.82, 1.34) | 0.78                     |
| <i>Cryptosporidium</i>                                     | 12 (4)               | 8 (3)                  | 0.70 (0.27, 1.72) | 0.78                     |
| <i>C. difficile</i>                                        | 12 (4)               | 9 (4)                  | 0.94 (0.38, 2.23) | 0.89                     |
| Shiga-like toxin-producing <i>E. coli</i> (STEC) stx1/stx2 | 21 (8)               | 9 (4)                  | 0.52 (0.22, 1.10) | 0.56                     |
| Adenovirus 40/41                                           | 8 (3)                | 5 (2)                  | 0.69 (0.21, 2.11) | 0.78                     |
| Rotavirus A                                                | 1 (0)                | 3 (1)                  | --                |                          |
| <i>Yersinia enterocolitica</i>                             | --                   | --                     | --                |                          |
| <i>Vibrio cholerae</i>                                     | 1 (0)                | --                     | --                |                          |
| <i>Entamoeba histolytica</i>                               | 2 (1)                | 1 (0)                  | --                |                          |

*Note:* Relative risk ratios rates (RR) were calculated using Poisson regression models adjusted for child's age and study site. Resulting two-sided *p*-values were adjusted for multiple comparisons using the Benjamini–Hochberg method. RRs, associated 95% CIs, and adjusted *p*-values are only presented for pathogens that were detected among at least 1% of samples; models failed to converge below this threshold. <sup>a</sup>Defined as any of the following: ETEC, STEC, or *Shigella*.
